# Supplementary material
Source: PubMed Central journal article supplement (PMC5646751)
Supplement: Supp_Fig1.pdf [file Supp_Fig1.pdf]

## Supplementary Data

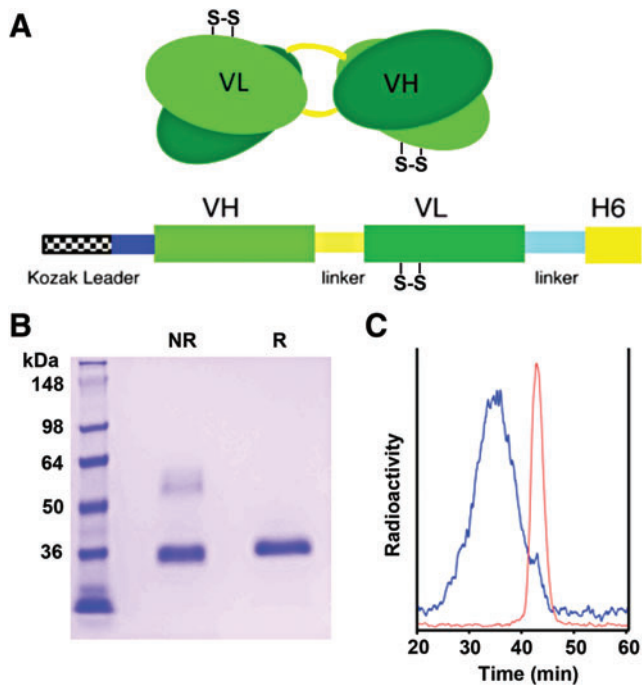

**SUPPLEMENTARY FIG. S1.** Anti-PSMA cys-DB. An anti-PSMA cys-DB was constructed in the variable heavy (VH) to variable light domain (VL) orientation joined by a Gly-Ser linker with a carboxy-terminal L6 linker and a H6 tag. For site-specific conjugation, four internal cysteines were introduced into the VL framework to form two disulfide loops. **(A)** Drawing of cys-DB and gene structure. **(B)** SDS-PAGE gel of the cys-DB under nonreducing (NR) and reducing (R) conditions. **(C)** Radiochromatogram of anti-PSMA cys-DB immunoreactivity. The  $^{125}\text{I}$ -anti-PSMA cys-DB (*red*) was analyzed by SEC and then incubated with unlabeled PSMA antigen. The resultant radioactive complex (*blue*) shows binding as determined by a shift to higher molecular weight. cys-DB, cys-diabody; PSMA, prostate-specific membrane antigen; SDS-PAGE, sodium dodecyl sulfate-polyacrylamide gel electrophoresis; SEC, size-exclusion chromatography.
