# Supplementary material
Source: PubMed Central journal article supplement (PMC5646751)
Supplement: Supp_Fig2.pdf [file Supp_Fig2.pdf]

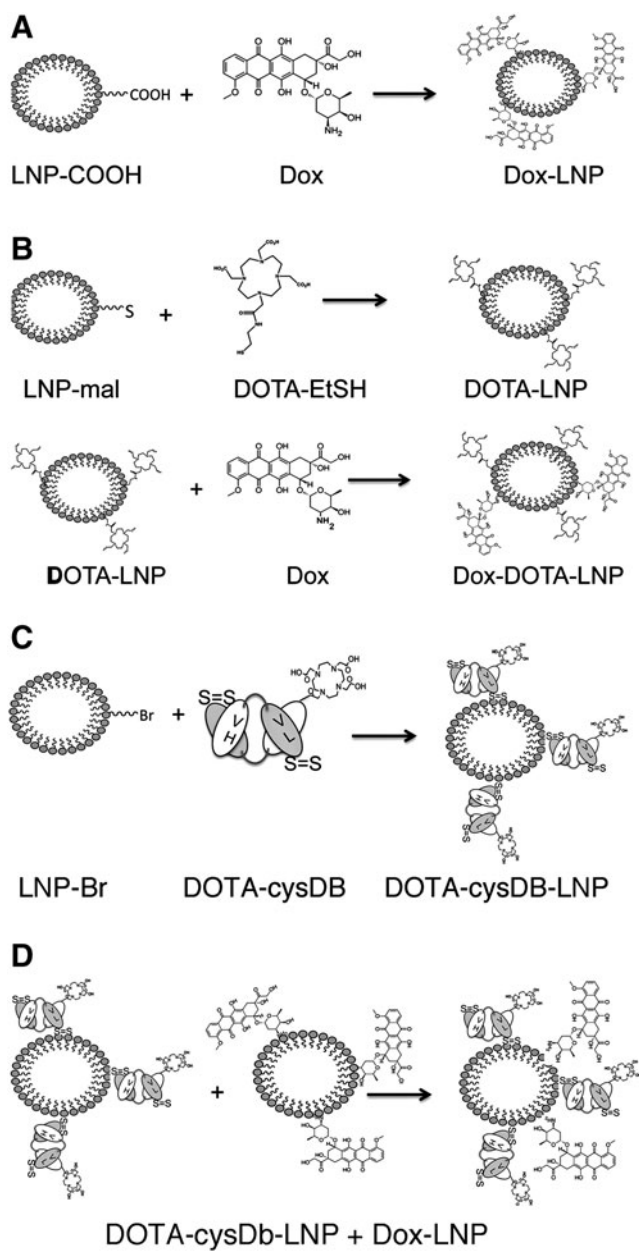

**SUPPLEMENTARY FIG. S2.** Schematic diagram depicting assembly of nanoparticle constructs. **(A)** Dox-LNP. **(B)** Dox-DOTA-LNP. **(C)** DOTA-cys-DB-LNP. **(D)** Mixing of DOTA-cys-DB-LNP and Dox-DOTA-LNP. cys-DB, cys-diabody; Dox, doxorubicin; LNP, lipid nanoparticle.
