# Supplementary material
Source: PubMed Central journal article supplement (PMC5646751)
Supplement: Supp_Fig3.pdf [file Supp_Fig3.pdf]

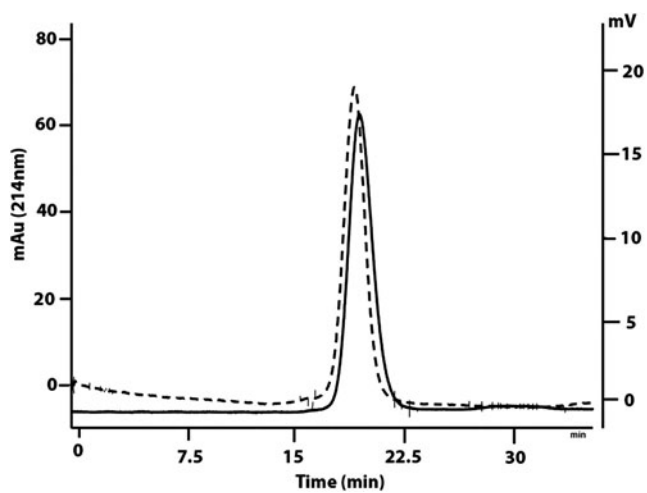

**SUPPLEMENTARY FIG. S3.** SEC analysis of Dox-LNP. DSPE-PEG<sub>2000</sub>-COOH was conjugated to fluorescent Dox. The SEC chromatogram of the Dox-LNP shows the Absorbance<sub>214</sub> (*solid line*) coregisters with the fluorescent 550 nm peak (*dashed line*). Dox, doxorubicin; DSPE-PEG, distearoylphosphatidyl ethanolamine-polyethylene glycol; LNP, lipid nanoparticle; SEC, size-exclusion chromatography.
