# Supplementary material
Source: PubMed Central journal article supplement (PMC5646751)
Supplement: Supp_Fig4.pdf [file Supp_Fig4.pdf]

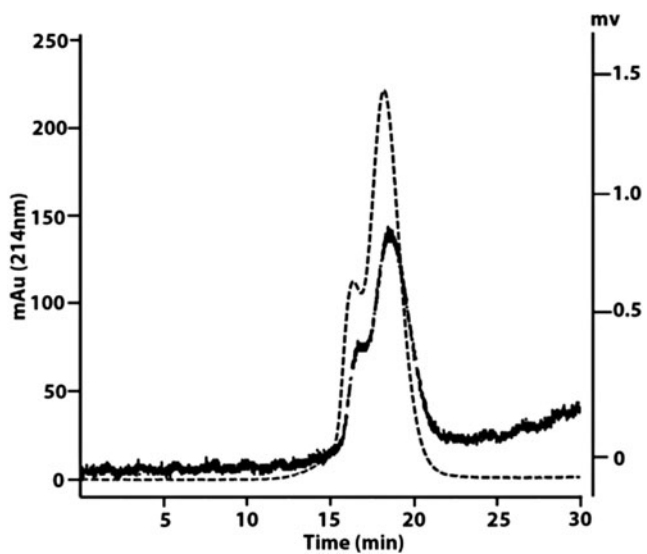

**SUPPLEMENTARY FIG. S4.** SEC analysis of Dox-DOTA-LNP. The Dox-DOTA-LNP was analyzed on SEC by Absorbance<sub>214</sub> (*solid line*) and fluorescence (*dashed line*) revealing two poorly separated peaks, eluting at 16 and 18 minutes. Dox, doxorubicin; LNP, lipid nanoparticle; SEC, size-exclusion chromatography.
