# Supplementary material
Source: PubMed Central journal article supplement (PMC5646751)
Supplement: Supp_Fig5.pdf [file Supp_Fig5.pdf]

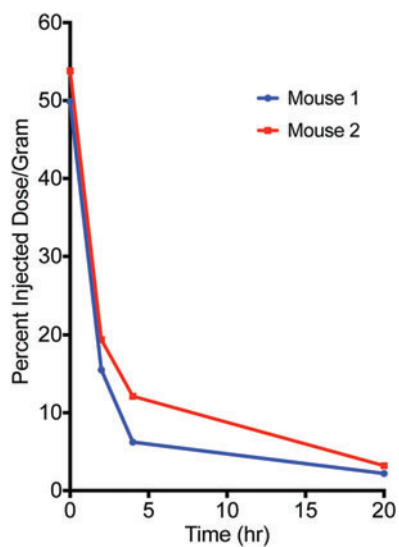

**SUPPLEMENTARY FIG. S5.** Blood clearance of  $^{64}\text{Cu}$ -Dox-DOTA-LNP. The  $^{64}\text{Cu}$ -Dox-DOTA-LNP was injected into two NOD/SCID mice, and blood was collected at various times, counted for radioactivity. The data are plotted as percent injected dose per gram versus time to show the clearance rate. Dox, doxorubicin; NOD/SCID, non-obese diabetic severe combined immune deficiency; LNP, lipid nanoparticle.
