# Supplementary material
Source: PubMed Central journal article supplement (PMC5646751)
Supplement: Supp_Fig6.pdf [file Supp_Fig6.pdf]

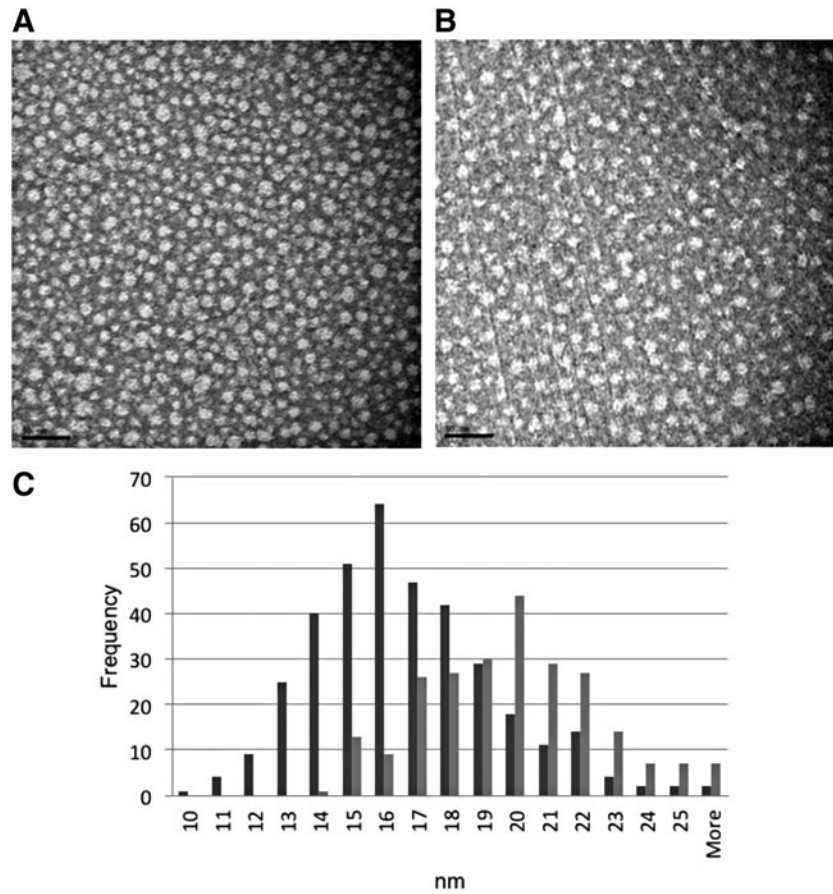

**SUPPLEMENTARY FIG. S6.** EM analysis of DOTA-cys-DB-LNP mixed with Dox-LNP. (A) The Dox-LNP was mounted on an EM grid, stained with uranyl acetate and analyzed by TEM. (B) DOTA-cys-DB-LNP + Dox-LNP mixture was analyzed by TEM. (C) Size comparison of the Dox-LNP micelles (*blue bars*) increased from 16 nm to 20 nm for the DOTA-cys-DB-LNP + Dox-LNP mixture (*rust bars*). cys-DB, cys-diabody; Dox, doxorubicin; EM, electron microscopy; LNP, lipid nanoparticle; TEM, transmission electron microscopy.
