# Supplementary material
Source: PubMed Central journal article supplement (PMC5646751)
Supplement: Supp_Fig7.pdf [file Supp_Fig7.pdf]

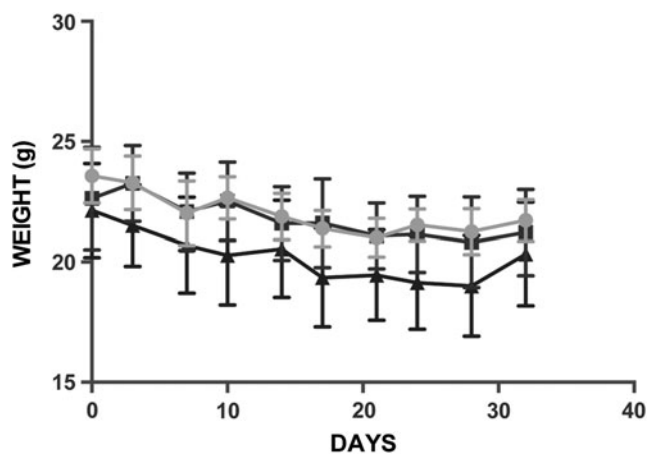

**SUPPLEMENTARY FIG. S7.** Monitoring of mice weight during therapy study. Mouse weights were recorded of groups of 7–8 male NOD/SCID mice bearing LnCap tumors treated twice a week for 4 weeks with saline (*red circles*), cys-DB-LNP plus Dox-LNP (*orange squares*) or cys-DB-LNP plus MMAE-LNP (*green triangles*). cys-DB, cys-diabody; LNP, lipid nanoparticle; NOD/SCID, non-obese diabetic severe combined immune deficiency.
