# Supplementary material
Source: PubMed Central journal article supplement (PMC5646751)
Supplement: Supp_Scheme1.pdf [file Supp_Scheme1.pdf]

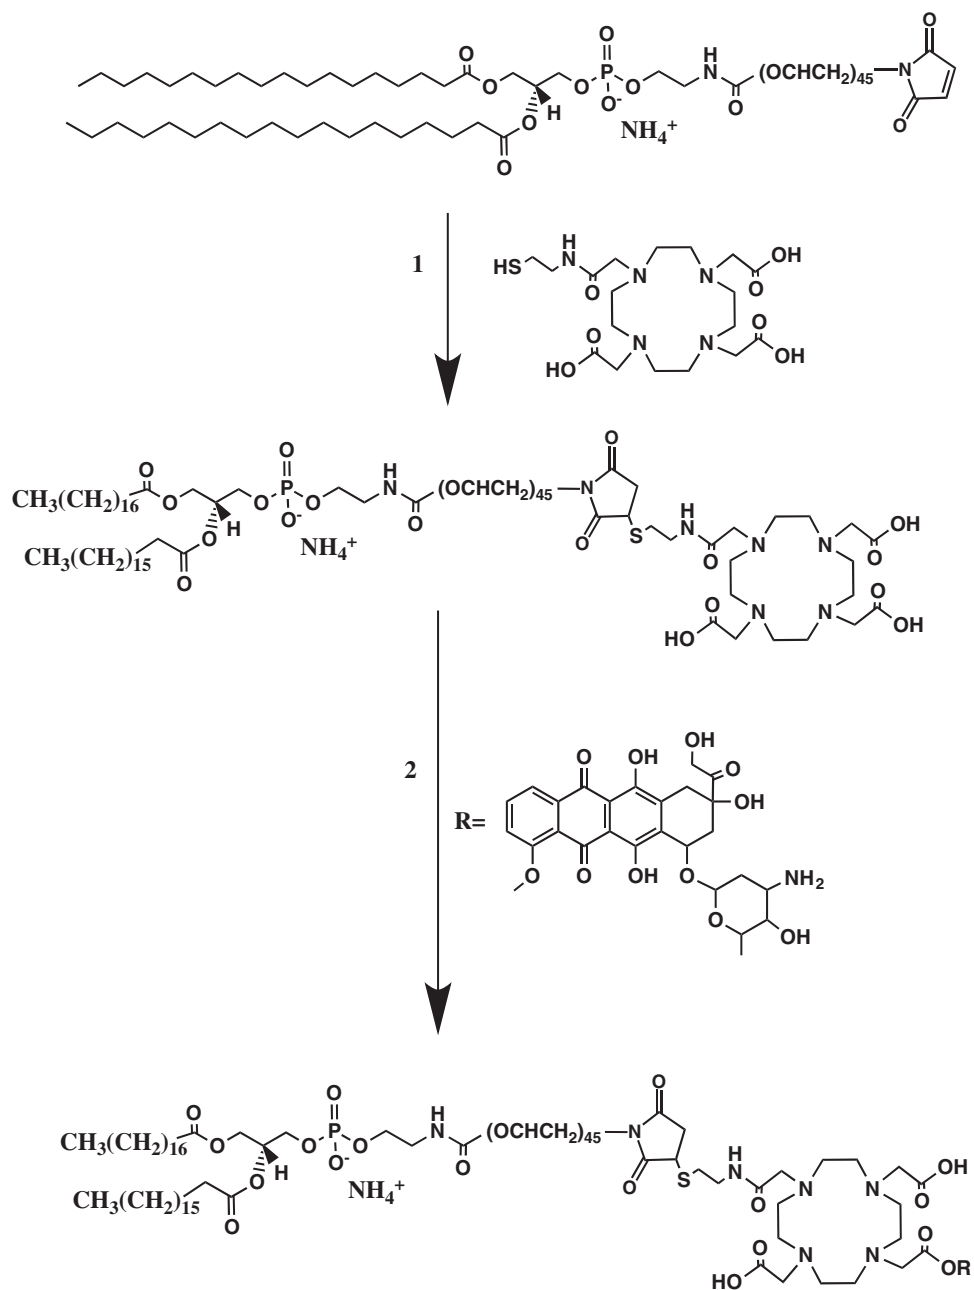

**SUPPLEMENTARY SCHEME 1, SYNTHESIS OF DOTA-DOX-LNP.** 1. DSPE-PEG<sub>2000</sub>-maleimide was reacted with the monoamidoethanethiol derivative of DOTA and the product purified by SEC. 2. The DOTA-LNP was activated with EDC/sulfo-NHS in PBS and reacted with a 2-fold excess of Dox-HCl and the product repurified by SEC. Two closely migrating peaks at 16 and 18 min were combined (**Fig. S4**).
